# Supplementary material
Source: PubMed Central journal article supplement (PMC4931865)
Supplement: supp_mol.116.104190_Supplemental_104190.pdf [file supp_mol.116.104190_Supplemental_104190.pdf]

**Cryo-EM analysis of the conformational landscape of human P-glycoprotein (ABCB1)  
during its catalytic cycle**

Gabriel A. Frank\*, Suneet Shukla\*, Prashant Rao, Mario J. Borgnia, Alberto Bartesaghi, Alan Merk, Aerfa Mobin, Lothar Esser, Lesley A. Earl, Michael M. Gottesman, Di Xia, Suresh V. Ambudkar<sup>§</sup>, and Sriram Subramaniam<sup>§</sup>

**Supplementary Table 1**

|                                  | <b>Closed</b> | <b>Open</b> |      |      |
|----------------------------------|---------------|-------------|------|------|
| <b>WT P-gp ‘apo’</b>             | 5315          | 4340        |      |      |
| <b>EQ P-gp ‘apo’</b>             | 34173         | 21815       |      |      |
| <b>EQ P-gp•ATP</b>               | 14158         | 11442       |      |      |
| <b>WT P-gp•ATP•V<sub>i</sub></b> | 10085         | ---         |      |      |
| <b>WT P-gp•ADP</b>               | ---           | 5750        | 6443 | 5074 |

-----, Not detected.

**Supplementary Table 1:** Number of particles in the 3D classes found in each of the states along the ATPase cycle of hP-gp. The numbers of particles in the last row are ordered as the maps in Figure 2. Dashes denote particles not detectable in indicated conformation.

## Supplementary Figure 1

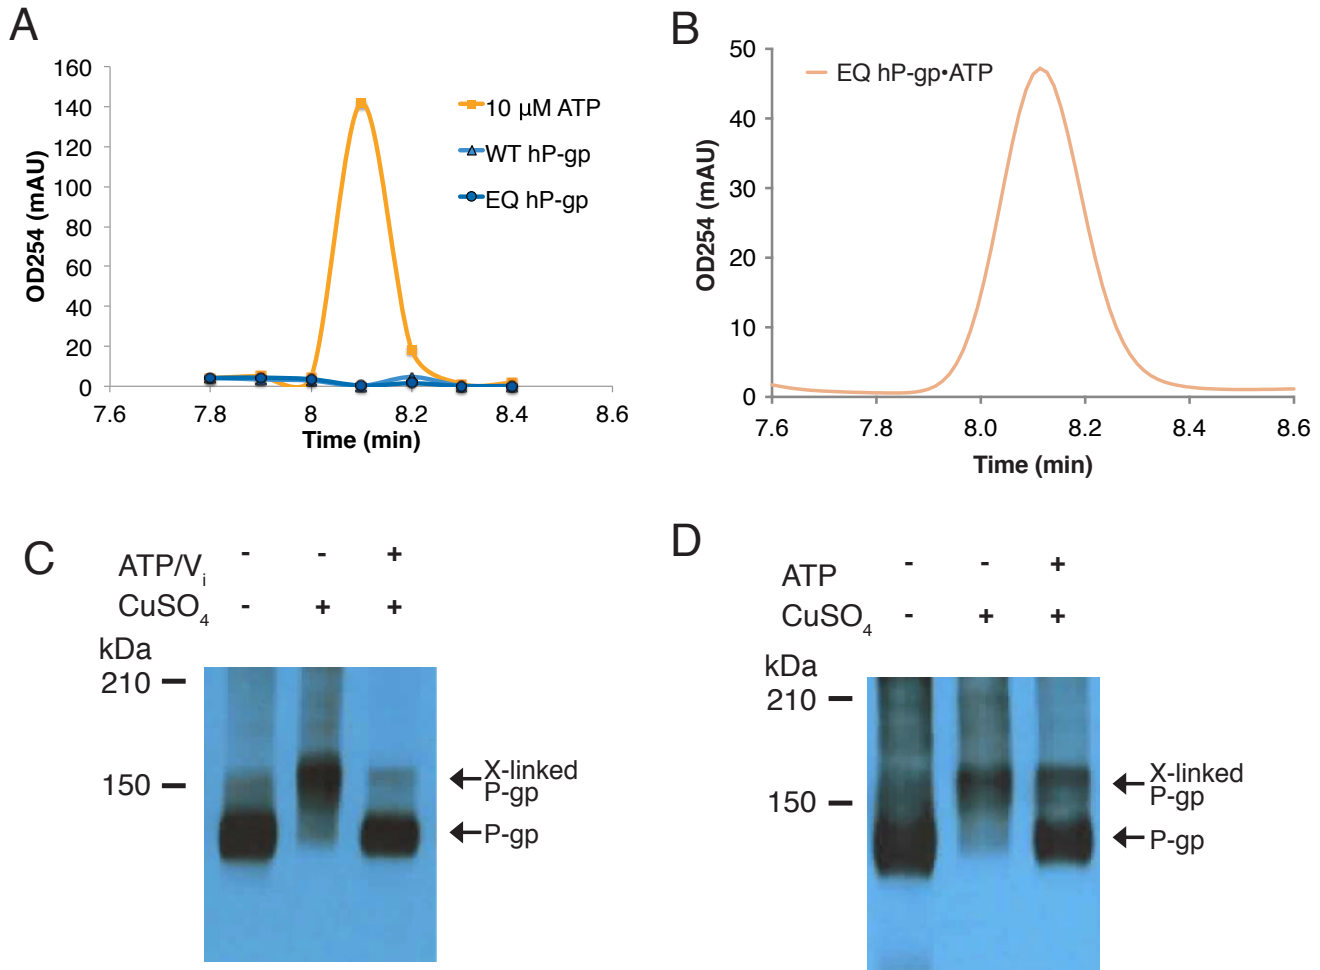

**Supplementary Figure 1:** Biochemical analysis and crosslinking of hP-gp. Extraction of ATP associated with purified hP-gp and  $\text{CuSO}_4$ -induced disulfide crosslinking of Cys residues in the Walker A domain of NBDs. (A) ATP was extracted from either 10  $\mu$ M of ATP in 200  $\mu$ l of elution buffer (square, orange), WT (triangle, light blue) and EQ-hP-gp (circle, dark blue) purified samples (15  $\mu$ M); and the samples were separated on a C18 reverse phase HPLC column, as described in materials and methods. Histogram of the elution of ATP is representative of three independent experiments. (B) Purified EQ hP-gp was incubated with 5 mM ATP at 30  $^\circ\text{C}$  for 15 min. Free ATP was separated by passing the samples three times through desalting columns (Thermo Fisher Scientific, Waltham, MA), per the manufacturer's protocol. The occluded ATP was extracted and separated on a C18 reverse phase HPLC column. The histogram of the elution of ATP is representative of three independent experiments. (C, D) The crude membranes expressing WT hP-gp (C) or EQ hP-gp (D) were incubated in the absence and presence of 5 mM ATP (plus 0.3 mM sodium orthovanadate for WT) and 10 mM  $\text{MgCl}_2$  at 37 $^\circ\text{C}$  for 10 min as indicated, and crosslinked with  $\text{CuSO}_4$  for 15 min and analyzed by Western blot analysis probed with C219 antibody. The arrows indicate bands corresponding to non-crosslinked and crosslinked hP-gp. Western blot is representative of four independent experiments.

## Supplementary Figure 2

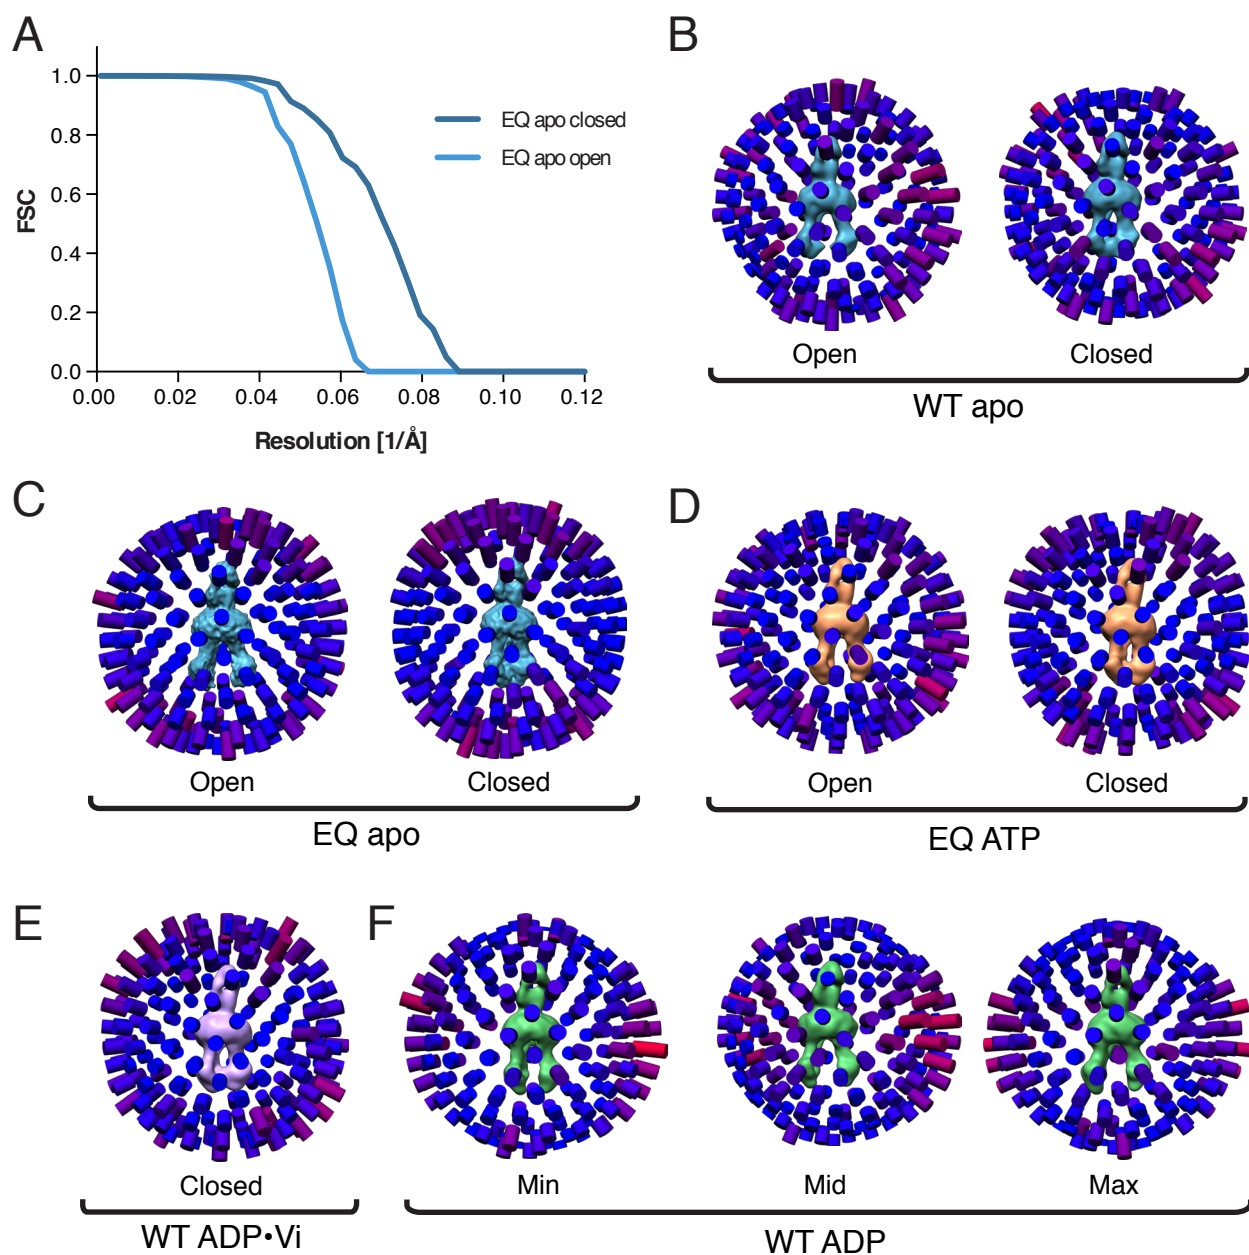

**Supplementary Figure 2:** Purification and cryo-EM analysis of hP-gp. (A) FSC plots of hEQ-P-gp apo open (light blue) and closed (dark blue) reconstructions shown in this manuscript. Estimated resolutions of all maps are given in Table S1. (b-f) Analysis of orientation assignment of individual particles for WT P-gp apo (B), EQ P-gp apo (C), EQ P-gp + ATP (D), WT ADP•Vi (E), and WT P-gp +ADP (F) reconstructions.
